# Supplementary material
Source: Springer Nature journal article supplement (https://www.springermedizin.de/resource/supplementary/13047_2012_465_MOESM4_ESM.pdf/9663708)

Difference MLEC session 1 and session 2

10  
5  
0  
-5  
-10

0 5 10 15 20 25

Average MLEC session 1 and session 2

+1.96 SD

5.32

Mean

0.34

-1.96 SD

-4.65

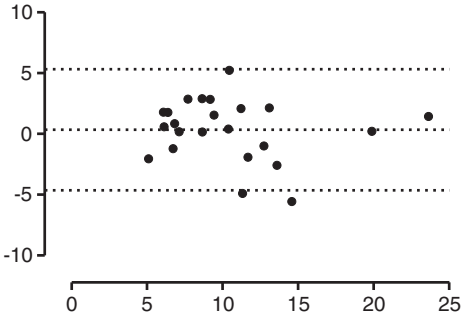

Supplement: MOESM4 [file 9663708]
